# Supplementary material
Source: ML conference proceedings conference paper supplement (https://proceedings.neurips.cc/paper_files/paper/2023/hash/cd86a30526cd1aff61d6f89f107634e4-Abstract.html)
Supplement: Supplementary file 1 [file cd86a30526cd1aff61d6f89f107634e4-Supplemental-Datasets_and_Benchmarks.pdf]

## A Dataset Access

We release our dataset and baseline at <https://github.com/MichSchli/AVeriTeC>, and will maintain it there. As we anticipate using the dataset in a future shared task, we are as of submission time only releasing the training and development splits. We will make the test split available privately to reviewers upon request.

## B Author Statement

The authors of this paper bear all responsibility in case of violation of copyrights associated with the AVERITECdataset.

## C Annotation Details

We carried out our annotations with the help of Appen (<https://appen.com/>), an Australian private company delivering machine learning products. The annotations took place on a special-purpose platform developed by our team and supplied to Appen. We will make the code for this platform available upon request. Appen provides guarantees that annotators are paid fairly: see <https://success.appen.com/hc/en-us/articles/9557008940941-Guide-to-Fair-Pay>. We spent a total of €40,835 for crowdworkers in our annotation process.

## D Baseline Prompts

### D.1 Claim Question Generation

To enrich our search results, we generate additional questions for use as search queries. For each claim, we retrieve the 10 most similar claims from the training dataset (computed using BM25). We combine these into a prompt following the scheme shown in Figure 3. We incorporate both the speaker and the claim itself in a form of preliminary experiments found to be highly effective: “*Outrageously, SPEAKER claimed that CLAIM. Criticism includes questions like:* ”. The adversarial tone encourages the model to generate questions useful for debunking – we found this to be crucial for finding additional useful search results beyond those returned using the claim itself.

### D.2 Passage Question Generation

Once search results have been found, we generate questions for each line of each searched document using the process described in Section 7.1. We retrieve the 10 most similar question-answer pairs from the training dataset (computed using BM25 between the answer and the evidence line). We combine these into a prompt following the scheme shown in Figure 3. We experimented also with including the claim when generating the questions, however, we found this to decrease performance by acting as a distractor; BLOOM would generate questions related only to the claim and unrelated to the evidence. Passage question generation was by far the most expensive part of our experiments. While we made sure the model fits in memory of an A100 GPU, we parallelized inference across several. Using eight GPUs, question generation took approximately 24 hours.

### D.3 Justification Generation

We use a further prompt to generate justifications given the claim and verdict for the no-evidence baseline. Again, for each claim, we retrieve the 10 most similar claims from the training dataset (computed using BM25). We experimented with the same adversarial form discussed for question generation in Appendix D.1, but did not see any improvements in performance.

## E Baseline Models

We finetuned models for several components of our baseline. The following sections list hyperparameter settings for each of those models. All training took place on a single Nvidia A100 GPU.

Outrageously, United We Win claimed that "As mayor, Cory Booker, US Democratic presidential candidate and US New Jersey Senator, passed criminal justice reform in a US Republican Senate.". Criticism includes questions like: Did U.S. Sen. Cory Booker pass criminal justice reform? What was the Republicans' majority in the Senate when the bill was signed into law?

Outrageously, Mokwele Kholofelo Banny claimed that "A married couple in Florida, Tito and Amanda Watts, was arrested for selling fake golden tickets to heaven to hundreds of people.". Criticism includes questions like: Did married couple Tito and Amanda Watts from Florida get arrested for selling fake golden tickets to heaven?

Outrageously, Muhammadu Buhari claimed that "It makes no sense for oil to be cheaper in Nigeria than in Saudi Arabia.". Criticism includes questions like: What was the price of petrol in Nigeria in Oct 2020? What was the price of petrol in Saudi Arabia in Oct 2020?

...

Outrageously, Tea talk and gossip claimed that "Microsoft cofounder Bill Gates said Be nice to nerds. Chances are you'll end up working for one.". Criticism includes questions like: Is Bill Gates quoted as saying "Be nice to nerds, chances are you'll end up working for one"?

Outrageously, Sen. Amy Klobuchar claimed that "US President Trump called for reduced funding for the Centre for Disease Control and Prevention.". Criticism includes questions like: Did US President Trump propose budget cuts in the funding for the Centre for Disease Control and Prevention?

Outrageously, US Democratic presidential candidate Wayne Messam claimed that "It is illegal for mayors to even bring up gun reform for discussion in Florida, US.". Criticism includes questions like:

Figure 3: Example prompt used to generate search questions for the claim *"It is illegal for mayors to even bring up gun reform for discussion in Florida, US."* with the speaker *"US Democratic presidential candidate Wayne Messam"*.

## E.1 Evidence Reranking

We used the BERT-large model [Devlin et al., 2019] with a text classification head, relying on the huggingface implementation [Wolf et al., 2020]. The model has 340 million parameters. We finetuned the model using Adam [Kingma and Ba, 2015] with a learning rate of 0.001 and a batch size of 128. The evidence reranker is trained using negative sampling. For each triple of claim  $c$ , question  $q$ , and answer  $a$ , we construct three negatives by corrupting each of  $c$ ,  $q$ , or  $a$ , for a total of 9 negative samples per positive. Corrupted elements are replaced with randomly selected others from the dataset.

## E.2 Stance Detection

The setup for the stance detection model is similar to the evidence reranker. We again used the BERT-large model [Devlin et al., 2019] with a text classification head, relying on the huggingface implementation [Wolf et al., 2020]. The model has 340 million parameters. We finetuned the model using Adam [Kingma and Ba, 2015] with a learning rate of 0.001 and a batch size of 128. To train the stance detection model, we constructed examples from the training set. For claims with *supported* labels, we created one example per question for a positive stance. For claims with *refuted* labels, we created one example per question for negative stance. For claims with *not enough evidence* labels, we created one example per question for a neutral stance. Finally, we discarded all claims with *conflicting evidence/cherry-picking as the label*.

|                                                                                                                                                                                                                                                                                                                                                                                                                                                                                                                                                                                                                                                                                                                                                                                                                                                                                                                                                                                                                                                                                                                                                                                                                                                                                                                                                                                                                                                                                                                         |
|-------------------------------------------------------------------------------------------------------------------------------------------------------------------------------------------------------------------------------------------------------------------------------------------------------------------------------------------------------------------------------------------------------------------------------------------------------------------------------------------------------------------------------------------------------------------------------------------------------------------------------------------------------------------------------------------------------------------------------------------------------------------------------------------------------------------------------------------------------------------------------------------------------------------------------------------------------------------------------------------------------------------------------------------------------------------------------------------------------------------------------------------------------------------------------------------------------------------------------------------------------------------------------------------------------------------------------------------------------------------------------------------------------------------------------------------------------------------------------------------------------------------------|
| <p>Evidence: The image of Time magazine cover with Rachel Levine as woman of the year was posted on Facebook by "The United Spot", which is labelled as a satire site. Question answered: Which website said that Rachel Levine was Time's Woman of the Year?</p> <p>Evidence: Yes, because the wording was actually "complete 57 mega dams". Question answered: In 2017, did the Kenyan Government manifesto say they would construct 57 mega dams?</p> <p>Evidence: No, because the blog text uses future terminology like "...the bill is being brought in..." and "...this nz food bill will pave the way...". Question answered: Does the blog post imply that this Food Bill is already legislation?</p> <p>...</p> <p>Evidence: China described the reports from Pakistan as "Baseless &amp; fake". Question answered: Did China report any losses relating to this clash?</p> <p>Evidence: After carrying a few boxes that appeared full of supplies, Pence was informed that the rest of the boxes in the van were empty and that his task was complete. "Well, can I carry the empty ones? Just for the cameras?" Pence joked. "Absolutely," an aide said as the group laughed. Pence then shuts the doors to the van and returns to talk to facility members from the nursing home. Question answered: Were the PPE boxes that Mike Pence delivered empty?</p> <p>Evidence: Kris tells the magazine Caitlyn was "miserable" and "pissed off" during the last years of their marriage. Question answered:</p> |
|-------------------------------------------------------------------------------------------------------------------------------------------------------------------------------------------------------------------------------------------------------------------------------------------------------------------------------------------------------------------------------------------------------------------------------------------------------------------------------------------------------------------------------------------------------------------------------------------------------------------------------------------------------------------------------------------------------------------------------------------------------------------------------------------------------------------------------------------------------------------------------------------------------------------------------------------------------------------------------------------------------------------------------------------------------------------------------------------------------------------------------------------------------------------------------------------------------------------------------------------------------------------------------------------------------------------------------------------------------------------------------------------------------------------------------------------------------------------------------------------------------------------------|

Figure 4: Example prompt used to generate a question for the evidence line *"Kris tells the magazine Caitlyn was "miserable" and "pissed off" during the last years of their marriage."*

### 697 E.3 Justification Generation

698 For the justification generation model, we used the BART-large model [Lewis et al., 2020]. As  
699 previously we relied on the huggingface implementation [Wolf et al., 2020]. BART-large has 406M  
700 parameters. We finetuned the model using Adam [Kingma and Ba, 2015] with a learning rate of  
701 0.001 and a batch size of 128. When generating, we used beam search with 2 beams and a maximum  
702 generation length of 100 tokens.

## 703 F Dataset statistics

704 To analyse our dataset, we computed various statistics for each dataset split. An overview of modalities  
705 in which evidence was found can be seen in Table 5. Statistics for claim type and fact-checker strategy  
706 can be found in Tables and respectively.

707 Annotators rely on evidence from a wide variety of different sources, taking evidence from a total of  
708 2989 different domains. Interestingly, the most frequent is twitter.com (3%), typically representing  
709 announcements from public officials. This is followed by africacheck.org (2.5%), as Africa Check  
710 relies to a greater extent on references to its own past articles. After this follow official sources  
711 (e.g. cdc.gov (1.5%), who.int (1.3%), gov.uk (0.7%), wikipedia.org (1.4%)) and news media (e.g.  
712 nytimes.com (1.1%), washingtonpost.com (0.7%), and reuters.com (0.6%). An interesting occurrence  
713 is a small number of non-textual sources, e.g. youtube.com (0.8%).

## 714 G ChatGPT Prompts

715 For the prompt used for our gpt-3.5-turbo experiments, see Figure 6.

|                                                                                                                                                                           |
|---------------------------------------------------------------------------------------------------------------------------------------------------------------------------|
| Claim: A married couple in Florida, Tito and Amanda Watts, was arrested for selling fake golden tickets to heaven to hundreds of people.                                  |
| Our verdict: Refuted.                                                                                                                                                     |
| Our reasoning: The answer and source clearly explain that it was an April Fool’s joke so the claim is refuted.                                                            |
| Claim: North Korea blew up the office used for South Korea talks.                                                                                                         |
| Our verdict: Supported.                                                                                                                                                   |
| Our reasoning: The building used was indeed destroyed.                                                                                                                    |
| ...                                                                                                                                                                       |
| Claim: US President Trump called for reduced funding for the Centre for Disease Control and Prevention.                                                                   |
| Our verdict: Supported.                                                                                                                                                   |
| Our reasoning: From the source, I saw tangible evidence where it stated that there was a proposal by US President Trump to slash more than \$1.2 billion of CDC’s budget. |
| Claim: It is illegal for mayors to even bring up gun reform for discussion in Florida, US.                                                                                |
| Our verdict: Conflicting Evidence/Cherrypicking.                                                                                                                          |
| Our reasoning:                                                                                                                                                            |

Figure 5: Example prompt used to generate a justification for the claim “*It is illegal for mayors to even bring up gun reform for discussion in Florida, US.*”. Evidence and verdict for the claim are produced in previous stages of the pipeline.

|                | Train | Dev  | Test |
|----------------|-------|------|------|
| Web text:      | 68.2  | 75.5 | 74.9 |
| PDF:           | 11.9  | 7.7  | 9.7  |
| Metadata:      | 6.1   | 5.9  | 5.0  |
| Web table:     | 4.9   | 3.0  | 2.9  |
| Video:         | 1.1   | 1.1  | 1.9  |
| Image/graphic: | 2.0   | 2.7  | 1.6  |
| Audio:         | 0.1   | 0.0  | 0.8  |
| Other:         | 1.3   | 1.4  | 0.2  |
| Unanswerable:  | 4.5   | 2.8  | 3.0  |

Table 5: Evidence modalities (%)

|                                                                                                                                                                                                                                                     |
|-----------------------------------------------------------------------------------------------------------------------------------------------------------------------------------------------------------------------------------------------------|
| Can you fact-check a claim for me? Classify the given claim into four labels: "true", "false", "not enough evidence" or "conflicting evidence/cherrypicking". Let’s think step by step. Provide justification before giving the label. Given claim: |
| It is illegal for mayors to even bring up gun reform for discussion in Florida, US.                                                                                                                                                                 |

Figure 6: Prompt used to generate evidence and verdicts with ChatGPT for the example claim “*It is illegal for mayors to even bring up gun reform for discussion in Florida, US.*”.

|                      | Train | Dev  | Test |
|----------------------|-------|------|------|
| Position Statement   | 7.8   | 5.8  | 7.0  |
| Numerical Claim      | 33.7  | 23.8 | 21.8 |
| Event/Property Claim | 57.8  | 61.4 | 69.8 |
| Quote Verification   | 9.6   | 13.8 | 7.7  |
| Causal Claim         | 11.5  | 10.8 | 11.9 |

Table 6: Claim types (%)

|                        | Train | Dev  | Test |
|------------------------|-------|------|------|
| Written Evidence       | 78.8  | 88.6 | 88.0 |
| Numerical Comparison   | 30.6  | 19.0 | 19.2 |
| Fact-checker Reference | 6.6   | 7.4  | 7.7  |
| Expert Consultation    | 29.9  | 27.4 | 29.6 |
| Satirical Source       | 3.6   | 2.0  | 1.8  |

Table 7: Fact-checker strategies (%)

## H Additional Results

### H.1 Claim type

We computed baseline performance in terms of veracity at different evidence thresholds for each claim type. Results can be seen in Table 9 below:

## I Data Statement

Following Bender and Friedman [2018], we include a data statement describing the characteristics of AVERITEC.

### I.1 Curation Rationale

We processed a total of 8,000 texts from the Google FactCheck Claim Search API, which collects English-language articles from fact-checking organizations around the world. We selected claims in the two-year interval between 1/1/2022 and 1/1/2020. Within that span, we selected all claims marked *true* by fact-checking organizations, as well as a random selection of other claims; this was done to reduce the label imbalance as much as possible.

We discarded claims in several rounds. First, any duplicate claims were discarded using string matching. Then, annotators discarded paywalled claims, as well as claims about or requiring evidence from modalities beyond text. Finally, we discarded any claim for which agreement on a label could not be found after two rounds of annotation.

### I.2 Language variety

We include data from 50 different fact-checking organizations around the world. While our data is exclusively English, the editing standards used at different publications differ. As such, several varieties of news domain English should be expected; given the distribution of fact-checkers involved, these will be dominated by *en-US*, *en-IN*, *en-GB*, and *en-ZA*.

### I.3 Speaker demographics

We did not analyse the demographics of the individual speakers for each claim. However, we asked annotators to specify the location most relevant to the claims. The distribution can be seen in Table 10.

|                            | Fraction of claims |
|----------------------------|--------------------|
| africacheck.org:           | 0.154              |
| politifact.com:            | 0.153              |
| leadstories.com:           | 0.096              |
| fullfact.org:              | 0.068              |
| factcheck.afp.com:         | 0.062              |
| factcheck.org:             | 0.050              |
| checkyourfact.com:         | 0.041              |
| misbar.com:                | 0.032              |
| washingtonpost.com:        | 0.029              |
| boomlive.in:               | 0.026              |
| dubawa.org:                | 0.023              |
| polygraph.info:            | 0.020              |
| usatoday.com:              | 0.019              |
| altnews.in:                | 0.019              |
| indiatoday.in:             | 0.019              |
| newsmeter.in:              | 0.018              |
| newsmobile.in:             | 0.015              |
| factly.in:                 | 0.015              |
| vishvasnews.com:           | 0.015              |
| aap.com.au:                | 0.014              |
| thelogicalindian.com:      | 0.013              |
| verafiles.org:             | 0.011              |
| nytimes.com:               | 0.011              |
| healthfeedback.org:        | 0.011              |
| thequint.com:              | 0.008              |
| newsweek.com:              | 0.005              |
| icirigeria.org:            | 0.005              |
| bbc.co.uk:                 | 0.004              |
| factcheck.thedispatch.com: | 0.004              |
| ghanafact.com:             | 0.003              |
| factcheckni.org:           | 0.003              |
| theferret.scot:            | 0.003              |
| rappler.com:               | 0.003              |
| covid19facts.ca:           | 0.003              |
| newsmobile.in:80:          | 0.002              |
| thegazette.com:            | 0.002              |
| abc.net.au:                | 0.002              |
| ha-asia.com:               | 0.002              |
| sciencefeedback.co:        | 0.001              |
| cbsnews.com:               | 0.001              |
| fit.thequint.com:          | 0.001              |
| namibiafactcheck.org.na:   | 0.001              |
| thejournal.ie:             | 0.001              |
| poynter.org:               | 0.001              |
| zimfact.org:               | 0.001              |
| climatefeedback.org:       | 0.001              |
| factchecker.in:            | 0.001              |
| pesacheck.org:             | 0.001              |
| ghana.dubawa.org:          | 0.001              |
| scroll.in:                 | 0.001              |

Table 8: Fact-checking sites used

|                      | $\lambda = 0.2$ | $\lambda = 0.3$ |
|----------------------|-----------------|-----------------|
| Quote Verification   | .13             | 0.7             |
| Numerical Claim      | .17             | .10             |
| Event/Property Claim | .13             | .06             |
| Causal Claim         | .11             | .04             |
| Position Statement   | .10             | .04             |

Table 9: Baseline performance on each claim type, computed with two different evidence standards.

#### 741 I.4 Annotator demographics

742 For this dataset, we relied on the company *Appen* to provide annotators. Although the company itself  
743 is headquartered in Australia, demographic details regarding location or nationality for the annotators

| Country code | Count |
|--------------|-------|
| US:          | 1937  |
| IN:          | 536   |
| GB:          | 305   |
| KE:          | 293   |
| NG:          | 280   |
| ZA:          | 191   |
| PH:          | 73    |
| AU:          | 56    |
| CN:          | 55    |
| RU:          | 38    |
| CA:          | 31    |
| NZ:          | 23    |
| GH:          | 17    |
| IE:          | 17    |
| LK:          | 14    |
| TH:          | 12    |
| FR:          | 12    |
| PK:          | 12    |
| IL:          | 11    |
| IT:          | 10    |
| DE:          | 8     |
| ZW:          | 7     |
| HK:          | 7     |
| MM:          | 6     |
| BR:          | 6     |
| UA:          | 6     |
| KR:          | 5     |
| JP:          | 5     |
| KP:          | 5     |
| PL:          | 5     |
| None:        | 501   |

Table 10: Count of locations appearing in our dataset. All countries are listed using ISO country codes. Countries with fewer than five occurrences are excluded – we will provide this data upon request.

were unfortunately not shared with us. We employed a total of 25 annotators with an average age of 42, and a gender split of 64% women and 36% men.

## I.5 Speech situation

The original claims were uttered in a variety of situations. We did not track this statistic for the entire dataset. However, analyzing a randomly selected 20 claims from our dataset, the majority (11) are social media posts. 4 originate from public speeches by politicians, 3 from newspaper articles, 1 from a political candidate’s website, and 1 from a viral YouTube video.

The claims were all chosen by fact-checking organizations for analysis, and presented in a journalistic format on their websites.

## I.6 Text characteristics

We compute various statistics for the text included in this dataset; see Section 5 and Appendix F. The genre is a mix of political statements, social media posts, and news articles (see the previous subsection).

## J Annotation Guidelines

### J.1 Introduction

We aim to construct a dataset for automated fact-checking with the following guiding principles. First, we intend to decompose the evidence retrieval process into multiple steps, annotating each individual step as a question-answer pair (see Figure 7). Second, our dataset will be constructed from real-world claims previously checked by journalistic organisations, rather than the artificially created claims used in prior work.

Decomposing claim verification into generations and answering questions allows us to break complex real-world claims down to their components, simplifying the task. For example, in Figure 7, verifying the claim requires knowing the salary of the health commissioner, the governor, the vice president, and Dr. Fauci, so that they can be compared. Four separate questions about salary need to be asked in order to reach a verdict (i.e. that the claim is *supported*).

By decomposing the evidence retrieval process in this way, we also produce a natural way for systems to justify their verdicts and explain their reasoning to users. In addition to this, we annotate claims with a final justification, providing a textual explanation of how to combine the retrieved answers to reach a verdict. This allows users to follow each step of the retrieval and verification processes, and so understand the reasoning employed by the system.

**Claim:** Biden lead disappears in NV, AZ, GA, PA on 11 November 2020.

**Q1:** Which media project Biden will win in Nevada?

**A1:** ABC News, CBS News, NBC News, CNN, Fox News, Decision Desk HQ, Associated Press, Reuters, and New York Times.

**Q2:** Which media project Biden will win in Arizona?

**A2:** Fox News and Associated Pre.

**Q3:** Which media project Biden will win in Georgia?

**A3:** None.

**Q4:** Which media project Biden will win in Pennsylvania?

**A4:** ABC News, CBS News, NBC News, CNN, Fox News, Decision Desk HQ, Associated Press, Reuters, and New York Times.

**Verdict:** Refuted

**Justification:** Many media organizations believe Biden will win in NV, AZ, and PA. As such, his lead has not disappeared.

Figure 7: Example claim and question-answer pairs.

The annotation consists of the following three phases:

1. Claim Normalization.
2. Question Generation.
3. Quality Control.

Each claim should be annotated by different annotators in each phase. An annotator can participate in all three phases, but they will be assigned different claims.

780 **Warning!** Components of the AVeriTeC annotation tool may not render correctly in some browsers,  
 781 specifically *Opera Mini*. If this is an issue we recommend trying another browser, e.g. Firefox,  
 782 Chrome, Safari, or regular Opera.

## 783 J.2 Sign In

784 Each annotator will have received an **ID** and a **Password** with the access link to the annotation server.  
 785 The password can be changed after logging into the interface.

## 786 Important!

- 787 • Make sure to log out at the end of the session!
- 788 • Do not open multiple tabs/windows of the AVeriTeC annotation tool. Always use only one
- 789 window during annotation! If you are logged into multiple sessions using the same account,
- 790 the annotation tool may lose the data you enter.

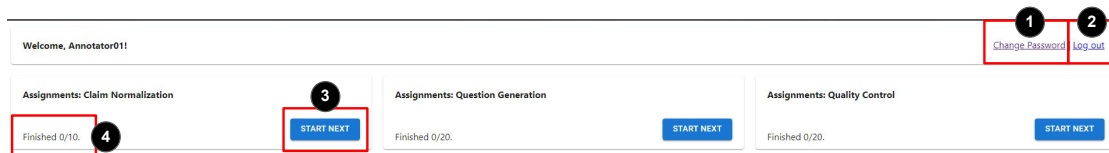

Figure 8: Interface of the control panel. (1) Button for changing the password. (2) Button for logout. (3) Start the annotation for this phase. Here is Phase 1 Claim Normalization. (4) The left number shows how many claims have been annotated and the right number shows how many claims are assigned for the current annotator at this phase.

791 After clicking the **START NEXT** button, the annotation phase will start. If an annotator is new to the  
 792 current phase, the interface will provide a guided tour as in Figure 9 for that phase. Please read the  
 793 hints provided by the tour guide carefully before the annotation.

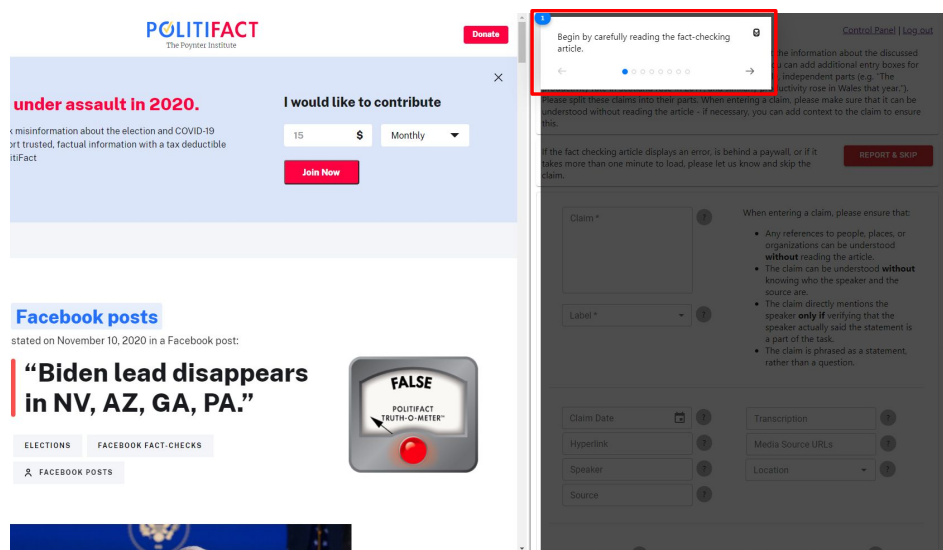

Figure 9: Interface of the tour guide.

### 794 J.3 Phase 1: Claim Normalization

795 In the first phase, annotators collect metadata about the claims and produce a normalized version of  
 796 each claim, as shown in Figure 10. The first step is to identify the claim(s) in the fact-checking article.  
 797 Often, this can be found either in the headline or explicitly in some other place in the fact-checking  
 798 article. In some cases, there may be a discrepancy between the article and the original claim (e.g.  
 799 the original claim could be “there are 30 days in March”, while the fact-checking article might  
 800 have the headline “actually, there are 31 days in March”). In those cases, it is important to use the  
 801 original version of the claim. If there is ambiguity in the article over the exact wording of the claim,  
 802 annotators should use their own judgment.

Figure 10: Interface of claim normalization. ① The fact-checking article provided. ② Guideline of annotation for this phase. Please read it before annotating. Notice that if the article displays a 404 page or another error, or if it takes more than one minute to load, please click the **REPORT & SKIP** button. ③ Fields for the normalized claim and the corresponding label. ④ General information of the claim. ⑤ Check-boxes for selecting the type of the claim. ⑥ Check-boxes for selecting the fact-checking strategy used. ⑦ Button for adding more claims. ⑧ Buttons for submitting the current claim, going to the previous claim, and the next claim.

#### 803 J.3.1 Overview

804 Here, we give a quick overview of the claim normalization task; an in-detail discussion can be found  
 805 in subsequent sections. Further documentation can also be found on-the-fly using the tooltips in the  
 806 annotation interface.

- 807 1. First, annotators should read the fact-checking article and identify which claims are being  
 808 investigated.
- 809 2. If the fact-checking article is paywalled or inaccessible due to a 404-page or a similar error  
 810 message, annotators should report this and skip the claim using the provided button. We  
 811 warn that some fact-checking articles can take too long to load – as such, while fact-checking  
 812 articles that do not load at all should be skipped, we ask annotators to wait for at least one  
 813 minute before skipping an article while it is still trying to load.

- 814 3. Most articles focus on one claim. However, some articles investigate multiple claims, or  
815 claims with multiple parts – in those cases, annotators should first split these into their parts  
816 (see Section J.3.2).
- 817 4. Some claims cannot be understood without the context of the fact-checking article, e.g.  
818 because they refer to entities not mentioned by name in the claim. In those cases, annotators  
819 should add context to the claims (see Section J.3.3).
- 820 5. Generally, we prefer claims to be as close as possible to their original form (i.e. the form  
821 originally said, *not* the form used in the fact-checking article). As such, contextualization  
822 should be done only when necessary, following the checklist in Section J.3.3.
- 823 6. Annotators should extract the verdict assigned to the claim in the article and translate it as  
824 closely as possible to one of our four labels – *supported*, *refuted*, *not enough evidence*, or  
825 *conflicting evidence/cherry picking* (see Section J.3.4). In phase one, annotators should give  
826 their own judgments – rather, they should match as closely as possible the judgments given  
827 by the fact-checking articles.
- 828 7. Claims will have associated metadata, i.e. the date the original claim was made, or the name  
829 of the person who made it. Annotators should identify and extract this metadata from the  
830 article (see Section J.3.6).
- 831 8. Annotators should identify the type of each claim, choosing from the options described  
832 in Section J.3.8. These are not mutually exclusive, and more than one claim type can be  
833 chosen.
- 834 9. Annotators should identify the strategies used in the fact-checking article to verify each claim,  
835 choosing from the options described in Section J.3.9. These are not mutually exclusive, and  
836 more than one claim type can be chosen.

### 837 J.3.2 Claim Splitting

838 Some claims consist of multiple, easily separable, independent parts (e.g. “*The productivity rate*  
839 *in Scotland rose in 2017, and similarly productivity rose in Wales that year.*”). The first step is to  
840 split these compound claims into individual claims. Metadata collection and normalization will then  
841 be done independently for each individual claim, and in subsequent phases, they will be treated as  
842 separate claims.

843 When splitting a claim, it is important to ensure that each part is understandable without requiring  
844 the others as context. This can be done either by adding metadata in the appropriate field, such  
845 as the claimed speaker or claim date, or through rewriting. For example, for the claim “*Amazon*  
846 *is doing great damage to tax paying retailers. Towns, cities, and states throughout the U.S. are*  
847 *being hurt - many jobs being lost!*”, it should be clear what is causing job loss in the second part.  
848 A possible split would be “*Amazon is doing great damage to tax paying retailers*” and “*Towns,*  
849 *cities and states throughout the U.S. are being hurt by Amazon - many jobs being lost*”. That is, it is  
850 necessary to rewrite the second part by adding *Amazon* a second time in order for the second part to  
851 be understandable without context.

### 852 J.3.3 Claim Contextualization

853 Some claims are not complete, which means they lack adequate contextualization to be verified. For  
854 example, in the claim “*We have 21 million unemployed young men and women.*”, there are unresolved  
855 pronouns without which the claim cannot be verified (e.g. *we* refers to Nigeria, as the speaker of the  
856 claim is the presidential candidate of Nigeria). Another example is “*Israel already had 50% of its*  
857 *population vaccinated.*” We need to know when this claim was made to verify its veracity, as time  
858 is crucial for this verification. For the latter, metadata is enough to resolve ambiguities; the former  
859 needs to be rewritten as “*Nigeria has 21 million unemployed young men and women.*”

860 Annotators are asked to contextualize claims to the original post by gathering the necessary infor-  
861 mation. Some information can be included simply as metadata, but this is not always enough –  
862 for information not captured by metadata, we ask that the claim itself is rewritten to include said  
863 information. Annotators need to follow this checklist:

- 864 1. Is the claim referring to entities that can only be identified by reading the associated fact-  
865 checking article, even if all metadata is taken into consideration? If so, add the names of the

- 866 entities (e.g. “*Former first lady said, ‘White folks are what’s wrong with America’.*” becomes  
867 “*Former first lady Michelle Obama said, ‘White folks are what’s wrong with America’.*”).
- 868 2. Does the claim have unnecessary quotation marks or references to a speaker (such as the  
869 word *says* in the example here)? If so, remove them (e.g. “*Says ‘Monica Lewinsky Found*  
870 *Dead’ in a burglary.*” becomes “*Monica Lewinsky found dead in a burglary.*”). Do NOT  
871 remove the reference to the speaker if the central problem is to determine if that person  
872 actually said the quote, e.g. in the case of quote verification.
- 873 3. Is the claim a question? If so, rephrase it as a statement (e.g. “*Did a Teamsters strike hinder*  
874 *aid efforts in Puerto Rico after Hurricane Maria?*” becomes “*A Teamsters strike hindered*  
875 *aid efforts in Puerto Rico after Hurricane Maria in 2017.*”).
- 876 4. Does the claim contain pronominal references to entities only mentioned in the fact-checking  
877 article? If so, replace the pronoun with the name of that entity. (e.g. “*We have 21 million*  
878 *unemployed young men and women.*” becomes “*Nigeria has 21 million unemployed young*  
879 *men and women.*”).
- 880 5. For some fact-checking articles, the title used does not properly match the fact-checked  
881 claim. Find the original claim in the article, and use that for producing the normalized  
882 version. As shown in Figure 11, the claim should be the first sentence of the article rather  
883 than the title.
- 884 6. Is the claim too vague to be investigated through the use of evidence, and does the fact-  
885 checking article investigate a more specific version of the claim? If so, use the claim  
886 investigated in the fact-checking article (e.g. “*Towns, cities, and states throughout the U.S.*  
887 *are being hurt by Amazon*” might become “*Towns, cities, and states throughout the U.S. are*  
888 *losing state tax revenue because of Amazon*”).
- 889 Generally, try to make claims specific enough so that they can *be understood* and so that *appropriate*  
890 *evidence can be found* by a person who has not seen the fact-checking article.

891 **Important!** We recommend reading through the entire article and understanding the central problem  
892 before rewriting the claim. This makes it easier to identify the exact phrasing of the original claim  
893 and to make any minimal interventions necessary following our checklist above. When in doubt as  
894 to whether a claim should be modified, we recommend leaving it unchanged – we generally prefer  
895 claims to be as close as possible to their original form, subject to the constraints listed above.

### 896 J.3.4 Labels

897 We ask annotators to produce a label for the claim relying *only* on the information on the fact-checking  
898 site (and assuming that everything reported it is accurate). For the dataset we are creating, we will be  
899 using four labels:

- 900 1. The claim is **supported**. The claim is supported by the arguments and evidence presented.
- 901 2. The claim is **refuted**. The claim is contradicted by the arguments and evidence presented.
- 902 3. There is **not enough evidence** to support or refute the claim. The evidence either directly  
903 argues that appropriate evidence cannot be found, or leaves some aspect of the claim neither  
904 supported nor refuted. We note that many fact-checking agencies mark claims as *refuted* (or  
905 similar), if supporting evidence does not exist, without giving any refuting evidence. We ask  
906 annotators to use *not enough evidence* for this category, regardless of the original label. In  
907 situations where evidence can be found that the claim is *unlikely*, even if the evidence is not  
908 conclusive, annotators may use *refuted*; here, annotators should use their own judgment. We  
909 give a few examples in Section J.3.5.
- 910 4. The claim is misleading due to **conflicting evidence/cherry-picking**, but not explicitly  
911 refuted. This includes cherry-picking (see <https://en.wikipedia.org/wiki/Cherry-picking>), true-but-misleading claims (e.g. the claim “*Alice has never lost an election*”  
912 with evidence showing Alice has only ever run unopposed), as well as cases where conflicting  
913 or internally contradictory evidence can be found.
- 914 Conflicting evidence may also be relevant if a situation has recently changed, and the claim  
915 fails to mention this (e.g. “*Alice is a strong supporter of industrial subsidies*” with evidence  
916 showing that Alice currently supports industrial subsidies, but in the past opposed industrial  
917 subsidies).



### J.3.5 Deciding Between Refuted and NEE

As mentioned, the line between *refuted* and *not enough evidence* requires annotators to rely on their own judgment in cases where refuting evidence cannot be directly found, but the claim is extremely unlikely. As a guiding principle, if annotators would feel doubt regarding the truth value of the claim – given the presented evidence and/or lack of evidence – *not enough evidence* should be chosen. Below, we give several examples from our dataset:

- “*The Covid-19 dusk-to-dawn curfew is Kenya’s first-ever nationwide curfew since independence.*” No evidence can be found that Kenya has implemented a nationwide curfew before the Covid-19 pandemic. However, it is conceivable that evidence of such a curfew would simply not show up in documentation uploaded to the internet. As such, the annotator cannot rule out a prior curfew beyond a reasonable doubt, and such should select *not enough evidence* as the label.
- “*The government in India has announced that it will shut down the internet to avoid panic about the Coronavirus.*” Evidence can be found that Indian law allows the government to do so as an emergency measure; however, the annotator finds no announcement from the government that the internet actually will be shut down. If other, regular, announcements from the same government body could be found, the claim should be labeled *refuted* – it would be extremely unlikely that a shutdown on the internet would not be announced via standard channels. However, in this case, standard channels do not make announcements in English, and therefore it is plausible that the announcement has not been found simply because it has not been translated; in this case, the annotator should select *not enough evidence* (with evidence that no English-language official channel exists).
- “*Shakira is Canadian.*” Evidence can be found that Shakira is usually described as Colombian, was born in Colombia, and holds Colombian citizenship. Furthermore, evidence shows she now resides in Spain. As no evidence of any connection to Canada can be found despite the wealth of information available about her, it is extremely unlikely that she is secretly Canadian; as such, the annotator can select *refuted* as the label.

A special case of this kind of claim is quote verification, where it can be difficult to establish that someone did *not* say something. In many cases, evidence can be found that a quote is fictional (e.g. by finding evidence from a service like <https://quoteinvestigator.com/>), or that it originates from someone else. However, in some cases, there is no readily available evidence. In this case, we advise that annotators document the lack of evidence that the person said *the quote itself*, or *any paraphrase of the quote*. Further, annotators should document that *some* quotes by that person can be found, if possible what the person has said *on the same topic*, and if possible that the quote has not been said by *someone else*. This establishes that evidence for the quote should be available, and is not; in that case, annotators can pick *refuted* as the label. If annotators cannot find any claims by the person or any evidence for the quote (say an entirely fictional person with an entirely fictional quote), they should pick *not enough evidence*.

For a good example of how to handle these cases, consider the claim “*RBI has said that ₹2000 notes are banned and ₹1000 notes have been introduced*”. As this claim is false, no evidence can be found of RBI making any such announcement; nor that they did *not* make that particular announcement. Here, the annotator first established where official communication from RBI is published with the question “*how do the RBI/central bank make announcements on changes to currency?*” Then, after finding that all official communication is posted to the RBI website, they asked a follow-up question testing whether evidence for the claim can be found *on the official website*.

### J.3.6 Metadata Collection

Annotators need to collect metadata through the following three steps.

### J.3.7 General Information

- A hyperlink to the original claim, if that is provided by the fact-checking site. Examples of this include Facebook posts, the original article or blog post being fact-checked, and embedded video links. If the original claim has a hyperlink on the fact-checking site, but that hyperlink is dead, annotators should leave the field empty.

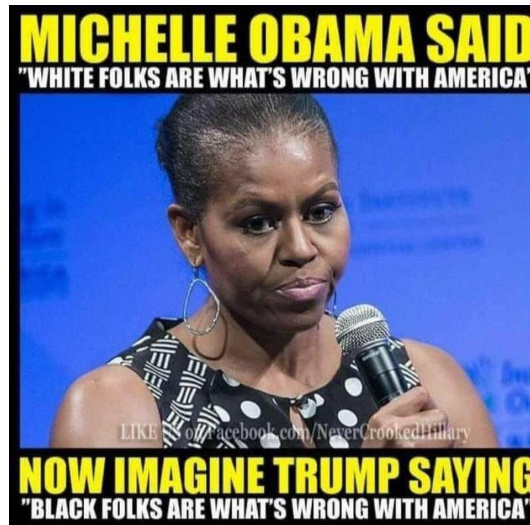

Figure 12: An example of an image claim requiring transcription.

- The date of the original claim, regardless of whether it is necessary for verifying the claim. This date is often mentioned by the fact checker, but not in a standardized place where we could automatically retrieve it. Note that the date for the *original claim* and the *fact-checking article* (often its publication date) may be different and both are stated in the text. We specifically need the original claim date, as we intend to filter out evidence that appeared after that date. If multiple dates are mentioned, the earliest should be used. If an imprecise date is given (e.g. February 2017), the earliest possible interpretation should be used (i.e. February 1st, 2017).
- The speaker of the original claim, e.g. the person or organization who made the claim.
- The source of the original claim, e.g. the person or organization who published the claim. This is not necessarily the same as the speaker; a person might make a comment in a newspaper, in which case the person is the speaker and the newspaper is the source.
- If the original claim is or refers to an image, video, or audio file, annotators should add a link to that media file (or the page that contains the file, if the media file itself is inaccessible).
- If the original claim is an image that contains text – for example, Figure 12 shows a Facebook meme about Michelle Obama – annotators should transcribe the text that occurs in the image as metadata. In the example, it would be “Michelle Obama said white folks are what’s wrong with America.”
- If the fact-checking article is paywalled or inaccessible due to an error message, annotators should report this and skip the claim using the corresponding button.

### J.3.8 Claim Type

The type of the claim itself, independent of the approach taken by the fact checker to verify or refute it, should be chosen from the following list. This is not a mutually exclusive choice – a claim can be speculation about a numerical fact, for example. As such, annotators should choose one *or several* from the list.

- **Speculative Claim:** The primary task is to assess whether a prediction is plausible or realistic. For example “*the price of crude oil will rise next year.*”
- **Opinion Claim:** The claim is a non-factual opinion, e.g. “*cannabis should be legalized*”. This contrasts with factual claims on the same topic, such as “*legalization of cannabis has helped reduce opioid deaths.*”
- **Causal Claim:** The primary task is to assess whether one thing caused another. For example “*the price of crude oil rose because of the Suez blockage.*”.

- 1024 • **Numerical claim.** The primary task is to verify whether a numerical fact is true, or to  
1025 verify whether a comparison between several numerical facts hold, or to determine whether  
1026 a numerical trend or correlation is supported by evidence.
  - 1027 • **Quote Verification.** The primary task is to identify whether a quote was actually said by the  
1028 supposed speaker. Claims *only* fall under this category if the quote to be verified directly  
1029 figures in the claim, e.g. “*Boris Johnson told journalists ‘my favourite colour is red, because*  
1030 *I love tomatoes’ ”.*
  - 1031 • **Position Statement.** The primary task is to identify whether a public figure has taken a  
1032 certain position, e.g. supporting a particular policy or idea. For example, “*Edward Heath*  
1033 *opposed privatisation*”. This also includes statements that opinions have changed, e.g.  
1034 “*Edward Heath opposed privatisation before the election, but changed his mind after coming*  
1035 *into office*”. Factual claims about the actions of people (e.g. “*Edward Heath nationalised*  
1036 *Rolls-Royce*”) are not position statements (they are event or property claims); claims about  
1037 the attitudes of people (e.g. “*Edward Heath supported the nationalisation of Rolls-Royce*”)   
1038 are.
  - 1039 • **Event/Property Claim.** The primary task is to determine the veracity of a narrative about a  
1040 particular event or series of events, or to identify whether a certain non-numerical property  
1041 is true, e.g. a person attending a particular university. Some properties represent causal  
1042 relationships, e.g. “*The prime minister never flies, because he has a fear of airplanes*”. In  
1043 those cases, the claim should be interpreted as both a property claim and a causal claim.
  - 1044 • **Media Publishing Claim.** The primary task is to identify the original source for a (poten-  
1045 tially doctored) image, video, or audio file. This covers both doctored media, and media that  
1046 has been taken out of context (e.g. a politician is claimed to have shared a certain photo, and  
1047 the task is to determine if they actually did). This also includes HTML-doctoring of social  
1048 media posts. We will discard all claims in this category.
  - 1049 • **Media Analysis Claim.** The primary task is to perform complex reasoning about pieces of  
1050 media, distinct from doctoring. This could for example be checking whether a geographical  
1051 location is really where a video was taken, or determining whether a specific person is  
1052 actually the speaker in an audio clip. The claim itself *must directly involve* media analysis;  
1053 e.g. “the speaker of these two clips is the same”. Claims where the original source is video,  
1054 but which can be understood and verified without viewing the original source, do not fall  
1055 under this category. An original video or audio file can feature as metadata in fact-checking  
1056 articles, but claims are only *complex media claims* if analysis of the video or audio beyond  
1057 just extracting a quote is necessary for verification.
- 1058 Several claim types – speculative claims, opinion claims, media publishing claims, and media analysis  
1059 claims – will not be included in later phases.

### 1060 J.3.9 Fact-checking Strategy

1061 After identifying the claim type, we ask annotators to classify the approach taken by the fact checker  
1062 according to the article. This is independent of the claim type, as a fact-checker might take any  
1063 number of approaches to a given claim. Again, one *or several* options should be chosen from the  
1064 following list:

- 1065 • **Written Evidence.** The fact-checking process involved finding contradicting or supporting  
1066 written evidence, e.g. a news article directly refuting or supporting the claim.
- 1067 • **Numerical Comparison.** The fact-checking process involved numerical comparisons, such  
1068 as verifying that one number is greater than another.
- 1069 • **Consultation.** The fact checkers directly reached out to relevant experts or people involved  
1070 with the story, reporting new information from such sources as part of the fact-checking  
1071 article.
- 1072 • **Satirical Source Identification.** The fact-checking process involved identifying the source  
1073 of the claim as satire, e.g. The Onion.
- 1074 • **Media Source Discovery.** The fact-checking process involved finding the original source of  
1075 a (potentially doctored) image, video, or soundbite.

- **Image analysis.** The fact-checking process involved image analysis, such as comparing two images.
- **Video Analysis.** The fact-checking process involved analysing video, such as identifying the people in a video clip.
- **Audio Analysis** The fact-checking process involved analysing audio, such as determining which song was played in the background of an audio recording.
- **Geolocation.** The fact-checking process involved determining the geographical location of an image or a video clip, through the comparison of landmarks to pictures from Google Streetview or similar.
- **Fact-checker Reference.** The fact-checking process involved a reference to a previous fact-check of the same claim, either by the same or a different organisation. Reasoning or evidence from the referenced article was necessary to verify the claim.

Claims *only* labelled as solved through Fact-checker Reference will not be included in later phases.

#### J.4 Phase 2: Question Generation and Answering

The next round of annotation aims to produce pairs of questions and answers providing evidence to verify the claim. The primary sources of evidence are the URLs linked in the fact-checking article. We also provide access to a custom search bar to retrieve evidence.

The figure displays the Politifact website and a detailed view of the question generation interface. The website shows a claim about Biden's disappearance and a 'FALSE' label. The interface view shows numbered steps: 1. Guideline of annotation, 2. Claim and metadata, 3. Question and answer fields, 4. Claim label selection, 5. Submit buttons, and 6. Custom search engine.

Figure 13: Interface of question generation. ① Guideline of annotation for this phase. Please read it before annotating. Notice that if the article displays a 404 page or another error, or if it takes more than one minute to load, please click the **REPORT & SKIP** button. ② The claim and the associated metadata. ③ Fields for the first question and its answers. Annotators can add up to 3 answers for each question if necessary. The text fields of metadata of question answer pairs are also provided. ④ Annotators can use the plus button to add as many questions as they want. Please select the label of this claim after finishing the question and answer generation. ⑤ Buttons for submitting the current claim, going to the previous claim, and next claim. ⑥ The custom search engine.

#### 1093 J.4.1 Overview

1094 Here, we give a quick overview of the question generation task; in-detail discussion can be found in  
1095 subsequent sections. Further documentation can also be found on-the-fly using the tooltips in the  
1096 annotation interface.

- 1097 1. The annotator should first read the claim and metadata provided by the previous annotator,  
1098 and the associated fact-checking article (including the verdict). We note that because phase-  
1099 one annotators sometimes split/decompose claims into parts, in some cases not all sections  
1100 of the fact-checking article will be relevant.
- 1101 2. The task is then to generate questions and answers about the claim such that a verdict can  
1102 be given without knowledge of the fact-checking article. The sources and strategies used in  
1103 the fact-checking article can serve as inspiration for questions and evidence for answers, but  
1104 the fact-checking article should not be *directly* referenced as a source.
- 1105 3. If an annotator believes a phase one claim has been extracted wrongly, they can correct it  
1106 using the appropriate box. This is not necessary for most claims, but adds an extra layer  
1107 of quality control. Guidance on correcting claims along with examples can be found in  
1108 Section J.4.2.
- 1109 4. We recommend constructing question-answer pairs iteratively, one at a time. That is,  
1110 annotators should ask a question and attempt to answer it, and only then proceed to the next  
1111 question.
- 1112 5. Guidance on generating questions can be found in Section J.4.3.
- 1113 6. Answers should be sought from the metadata, any of the sources listed on the fact-checking  
1114 article (e.g. any hyperlinks to other sites), and when that is not possible (e.g. due to the  
1115 hyperlinks being dead) from the internet using the search bar we provide.
- 1116 7. Questions about metadata can be used to draw attention to aspects of the claim, in order to  
1117 reason about publication date or publication source (see Section J.4.4).
- 1118 8. WARNING: For persistence, we have stored all fact-checking articles on archive.org. Fact-  
1119 checking articles may feature double-archived links using both archive.org and archive.is,  
1120 e.g.  
1121 `https://web.archive.org/web/20201229212702/https://archive.md/28fMd`.  
1122 Archive.org returns a 404 page for these. To view such a link, please just copy-paste the  
1123 archive.is part (e.g.  
1124 `https://archive.md/28fMd`) into your browser.
- 1125 9. Answers should be accompanied by a hyperlink to the source, and the type of the source –  
1126 e.g. web text, a pdf – should be specified. We note that if the source type is set as metadata,  
1127 the source link will automatically be set to the word *metadata*.
- 1128 10. Answers can be either *extraction*, e.g. copy-pasted directly from the source, *abstractive*,  
1129 e.g. written in free-form based on the source, or *boolean*, e.g. written as yes/no with an  
1130 explanation taken either extractively or abstractively from the source. Where possible, we  
1131 strongly prefer extractive answers.
- 1132 11. If an answer cannot be found, we also allow annotators to mark the question as unanswerable.  
1133 We ask annotators to use this instead of deleting unanswerable questions.
- 1134 12. Guidance on generating answers can be found in Section J.4.6.
- 1135 13. If enough questions have been asked to support a verdict, or if at least ten minutes have  
1136 passed without the annotator finding enough evidence, a verdict should be given from our  
1137 for labels described in Section J.3.4.
- 1138 14. Annotators in phase two should base their verdict on the question-answer pairs they have  
1139 generated, and *not* on the fact-checking article. Depending on what information has been  
1140 retrieved, they may therefore disagree with the article.
- 1141 15. Before proceeding to the next hit, the annotator will be shown a warning with the QA-pairs  
1142 they have generated. They will also be shown their assigned label. They will be asked to  
1143 confirm that the collected evidence is sufficient to assign the label they have chosen to the  
1144 claim.

1145 16. Sometimes, annotators may be in doubt as to whether an additional question should be  
1146 added to further support the verdict. Generally speaking, we always prefer to have as many  
1147 question-answer pairs as possible, so if in doubt annotators should veer on the side of adding  
1148 that additional question.

1149 **Important!** Annotators should not choose a label if the retrieved evidence does not support it;  
1150 for example, if the label **conflicting evidence** is chosen, there should be evidence documenting the  
1151 conflict. Labels in phase two can contradict the label of the fact-checker, if the annotator believes it is  
1152 appropriate.  
1153

#### 1154 J.4.2 Claim Correction

1155 In addition to gathering question-answer pairs, Phase Two also acts as quality control for the  
1156 claim contextualization in Phase One. This means if Phase Two annotators encounter a claim  
1157 that is malformed or not properly contextualized, they can correct it. The guidelines for claim  
1158 contextualization can be seen in Section J.3.3; the same criteria hold. Based on our initial review of  
1159 the data entered in Phase One, Claim Correction is rarely necessary. Below are some examples from  
1160 the data of claims that *should* be corrected in Phase Two:

- 1161 1. The claim “*Nigerian vice presidential candidate Peter Obi claimed that Capital expenditure*  
1162 *in 2016 was N1.2 trillion and 2017 was N1.5 trillion.*”, given the article <https://africacheck.org/fact-checks/reports/battle-titans-fact-checking-arch-rivals-race-nigerias-presidency>. The article verifies the numerical value of capital  
1163 expenditure in Nigeria, not whether Peter Obi has claimed anything about it. The original  
1164 article is not quote verification, but the annotator has changed the claim to that. Here, the  
1165 Phase Two annotator should correct the claim to simply “*Nigerian capital expenditure in*  
1166 *2016 was N1.2 trillion and 2017 was N1.5 trillion.*”
- 1169 2. The claim “*Abolish all charter schools*”, given the article <https://www.factcheck.org/2020/07/trump-twists-bidens-position-on-school-choice-charter-schools/>. This is a position statement about Joe Biden’s stance on charter schools; however,  
1170 the annotator has removed all reference to Joe Biden. The Phase Two annotator should  
1171 correct the claim to “*Joe Biden wants to abolish all charter schools*”.
- 1174 3. The claim “*Is Florida doing five times better than New Jersey?*”, given the article <https://leadstories.com/hoax-alert/2020/07/fact-check-florida-is-not-doing-five-times-better-in-deaths-than-new-york-and-new-jersey.html>. The  
1175 claim has mistakenly been phrased as a question. It is also too vague. The Phase Two  
1176 annotator should correct this, following the article: “*Florida is doing five times better than*  
1177 *New Jersey in COVID-19 deaths per 1 million population*”.

#### 1180 J.4.3 Question Generation

1181 To ensure the quality of the generated questions, we ask the annotators to create their questions as  
1182 follows:

- 1183 • Questions should be well-formed, rather than search engine queries (e.g. “where is Cam-  
1184 bridge?” rather than “Cambridge location”).
- 1185 • Questions should be standalone and understandable without any previous questions.
- 1186 • Questions should be based on the version of the claim shown in the interface (i.e. the version  
1187 extracted by phase one annotators), and not on the version in the fact-checking article. If an  
1188 annotator believes a phase one claim has been extracted wrongly, they can correct it using  
1189 the appropriate box.
- 1190 • The annotators should avoid any question that directly asks whether or not the claim holds,  
1191 e.g. “*is it true that [claim]*”.
- 1192 • The annotators should ask all questions necessary to gather the evidence needed for the  
1193 verdict, including world knowledge that might seem obvious, but could depend for example  
1194 on where one is from. For example, Europeans might have better knowledge of European  
1195 geography/history than Americans, and vice-versa.

- As a guiding principle, at least 2 questions should be asked. This is not a hard limit, however, and the annotators can proceed with only one question asked if they do not feel more are needed.

The following are examples used to illustrate how questions should be asked. These are based on the real claim “*the US in 2017 has the largest percentage of immigrants, almost tied now with the historical high as a percentage of immigrants living in this country*”:

- Good: What was the population of the US in 2017?
- Good: How many immigrants live in the US in 2017?
- Bad: What was the population of the US? [No time specified to find a statistic]
- Bad: What was the population there in 2017? [What does *there* refer to?]
- Bad: Is it true that the US in 2017 has the largest percentage of immigrants, almost tied now with the historical high as a percentage of immigrants living in this country? [Directly paraphrases the claim]

#### J.4.4 Metadata

Questions about metadata can be used to draw attention to aspects of the claim, in order to reason about publication date or publication source. If, for example, the claim “*aliens made contact with earth March 3rd, 2021*” was published on September 1st, 2020, the publication date can be used to refute the claim. In such cases, we ask annotators to first generate a question/answer pair – “*when was this claim made?*” “*September 1st, 2020*” – which can then be used to refute the claim. Similarly, questions about publication source can be used to refute satirical claims – “*where was this claim published?*”, “*www.theonion.com*”, “*what is The Onion?*”, “*The Onion is an American digital media company and newspaper organization that publishes satirical articles on international, national, and local news.*”.

#### J.4.5 Common sense assumptions and world knowledge

As a part of the question generation process, annotators may have to make assumptions and/or use world knowledge to interpret the claim. For example, for the claim “*Shakira is Canadian*”, it may be necessary to choose what it means to be Canadian. This is expressed in how questions are formulated, e.g. “*does Shakira have Canadian citizenship?*” or “*where does Shakira live?*”. This may also involve politically charged judgments. For example, some First Nations people are classed as Canadian by the Canadian government, but do not use that label for themselves.

In such cases, we ask annotators to follow – as closely as possible – the judgments made by the fact-checking websites. If the annotators feel that these are incomplete or misleading, they can add additional questions.

For example, for the claim “*Edward Heath opposed privatisation*”, a fact checker might provide his party manifesto as evidence. A corresponding question could then be “*what did the 1970 Conservative Party manifesto say about privatisation?*” An annotator could encounter evidence for the nationalisation of Rolls Royce during Heath’s government, which the fact-checking article did not take into account. In that case, the annotator might want to add an additional question, such as “*did Heath’s government nationalise any companies?*”. The annotators should ask *both* questions.

**Important!** As opposed to Phase 1, annotators in Phase 2 *should* use their own judgment to assign labels (although they should not ignore evidence used by the fact-checker). As such, if they disagree with the fact-checker about the label, they can select a different label.

#### J.4.6 Answer Generation

To find answers to questions, the annotators can rely on metadata, or on any sources linked from the factchecking site. Where these fail to produce appropriate information – either because they are not relevant to an asked question or because they refer to sources which have been taken down – we provide search functionalities as an alternative. Note that the annotators are not allowed to use the fact-checking article itself as a source, only the pages *hyper-linked* in the fact-checking article (and

only when they are not from fact-checking websites). Similarly, other fact-checking articles found through search should be avoided.

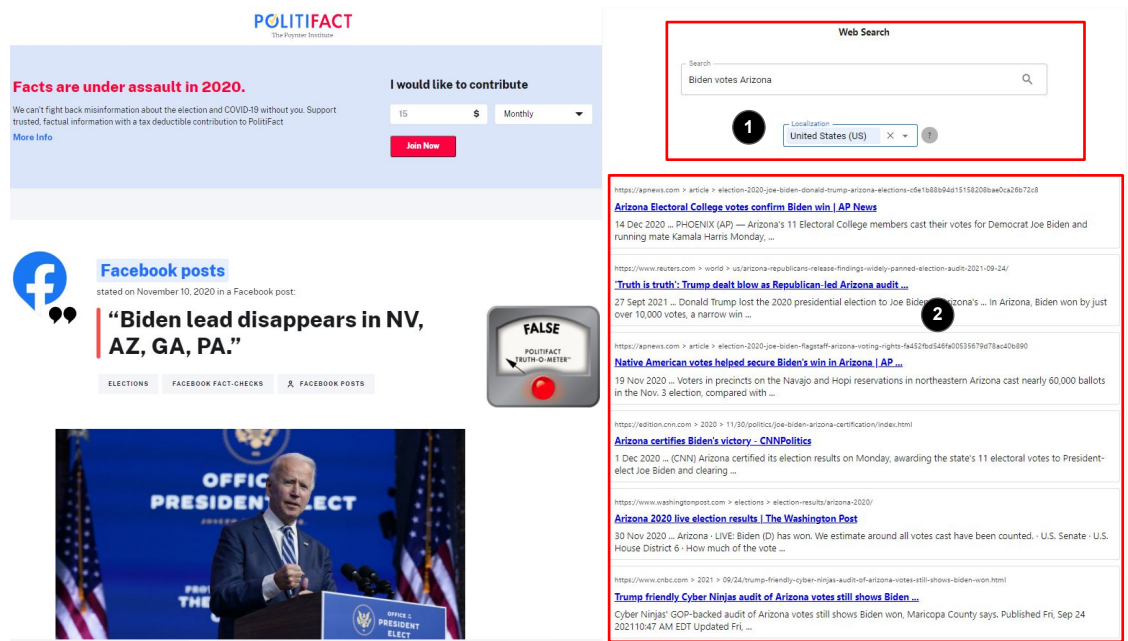

Figure 14: Interface of the search bar. ① Search bar and the location option. Annotators can change the localization of the search engine by selecting the country code here. ② Search results returned by the search engine.

Once an answer has been found, annotators can choose between the following four options to enter it:

- **Extractive:** The answer can be copied directly from the source. We ask the annotators to use their browser's copy-paste mechanism to enter it.
- **Abstractive:** A freeform answer can be constructed based on the source, but not directly copy-pasted.
- **Boolean:** This is a special case of abstractive answers, where a yes/no is sufficient to answer the question. A second box must be used to give an explanation for the verdict grounded in the source (e.g. "yes, because...").
- **Unanswerable:** No source can be found to answer the question.

For extractive, abstractive, and boolean answers, the annotators are also asked to copy-paste a link to the source URL they used to answer the question. Extractive answers are preferred to abstractive and boolean answers.

In some cases, annotators might find different answers from different sources. Our annotation tools allows adding additional answers, up to three. While we provide this functionality, we ask that annotators try to rephrase the question to yield a single answer before adding additional answers.

We note that if the annotators can only find a *partial* answer to a question, they can still use that. In such cases, please give the partial answer rather than marking the question as unanswerable.

Our search engine marks pages originating from known sources of misinformation and/or satire. We do not prevent annotators from using such sources, but we ask that annotators avoid them if at all possible. In the event that an annotator wishes to use information from such a source, we strongly prefer that the finds similar, corroborating information from an additional source in order to further substantiate the evidence.

While answering a question, we furthermore ask annotators to adhere to the following:

1269 **Important!**

- 1270 • DO NOT use any other browser window/search bar to find an answer. You MUST use the  
1271 provided search bar only.
- 1272 • DO NOT give a verdict for the claim until you have finished questions and answers.
- 1273 • DO NOT use the fact-checking article itself, or any other version of it you find on the  
1274 internet, as evidence to support an answer.
- 1275 • DO NOT submit answers using other articles from fact-checking websites, such as politi-  
1276 fact.com or factcheck.org, as evidence.
- 1277 • DO NOT simply reference the source as an authority in abstractive answers (and boolean  
1278 explanations), e.g. do not use answers like “yes, because the Guardian says so”. Rather,  
1279 write out what the source says, e.g. “yes, because £18.1 bn is 41% of the budget”. If you  
1280 consider it important to mention the source, write that the source says – e.g., “yes, because  
1281 according to the Guardian £18.1 bn was spent, which is 41% of the budget”.

#### 1282 J.4.7 Reasoning Chains of Claims

1283 Annotators can build up reasoning chains across multiple questions, meaning that answers of one  
1284 question can be used in the next question. For example, for the claim “the fastest train in Japan  
1285 drives at a top speed of 400 km/h”, the first question is “What is the fastest Japanese train?”. The  
1286 answer is “The fastest Japanese train is Shinkansen ALFA-X”. Based on the answer, we can further  
1287 ask the second question to get more details, “What is the maximum operating speed of the Shinkansen  
1288 ALFA-X”. Note that while the *generation* of the second question assumes knowledge of the answer  
1289 to the first, it is *understandable* without it.

#### 1290 J.4.8 Confirmation

1291 After submitting the question/answer pairs for a claim, annotators will be presented with a con-  
1292 firmation screen (see Figure 15). Annotators will be shown the question/answer pairs they have  
1293 entered, along with the verdict, and asked to confirm a second time that the verdict is supported by  
1294 the evidence.

Thorough hand-washing with an ordinary soap is effective in killing coronavirus (COVID-19).

Claim Label \*

Supported

CANCEL CONFIRM

Confirmation (3/20) [Control Panel](#) | [Log out](#)

Please confirm that you can infer your chosen verdict using ONLY your question-answer pairs (shown below).

Question

How does soap kill coronavirus?

Answer

The outer layer of the virus is made up of lipids, aka fat. Soap dissolves that barrier, killing the virus.

[View source](#)

Question

How does handwashing fight coronavirus?

Answer

Coronavirus can spread through tiny droplets if the infected person coughs and sneezes. Touching any surface with droplets on, and then touching your eyes, nose, or mouth, can transmit the disease.

[View source](#)

Figure 15: Before moving on to the next claim, phase two annotators will be shown a confirmation screen to make sure that their chosen verdict is correct.

## 1295 J.5 Phase 3: Quality Control

1296 Once we have collected evidence in the form of generated questions and retrieved answers, we want  
1297 to provide a measure of quality. Given a claim with associated evidence, we ask a third round of  
1298 annotators to give a verdict for the claim. Crucially, the annotators at this round do not have access to  
1299 the original fact-checking article, or to the claim label.

### 1300 J.5.1 Overview

1301 Here, we give a quick overview of the quality control task; in-detail discussion can be found in the  
1302 following sections. Further documentation can also be found on-the-fly using the tooltips in the  
1303 annotation interface.

- 1304 1. Annotators should first read the claim, the metadata, and the question-answer pairs. This is  
1305 the only information which should be used during this phase
- 1306 2. It is important that annotators in the quality control phase do not use web search to find  
1307 additional information, or rely on background knowledge which an average English speaker  
1308 might not have. Commonsense facts that are known to (almost) everyone can be used – see  
1309 Section J.5.2.
- 1310 3. If the claim, or any of the question-answer pairs lack context, they can be flagged. This  
1311 helps us diagnose what is wrong with a set of question-answer pairs in the case annotators  
1312 disagree over the label.
- 1313 4. After reviewing the claim and the QA pairs, annotators should assign a label to the claim  
1314 (see the four labels introduced in Section J.3.4).
- 1315 5. Finally, annotators should write a short statement justifying the verdict. If any commonsense  
1316 information (e.g. background knowledge which an average English speaker *is* likely to have)  
1317 is used to give the verdict, but that information is not mentioned in any question-answer pair,  
1318 it should be mentioned in the justification. For advice regarding justification production, see  
1319 Section J.5.3.

### 1320 J.5.2 Commonsense Knowledge

1321 When giving a verdict, annotators sometimes need to rely on commonsense knowledge. Here, we  
1322 consider only basic facts which an average English speaker is likely to know – e.g. “*Earth is a planet*”  
1323 or “*raindrops consist of water*”. No other information beyond the question-answer pairs can be used  
1324 in this phase.

1325 We ask annotators to be relatively strict with what they consider commonsense, but use their own  
1326 judgment. For example, we would consider “*Canada is a country*” commonsense, but not “*Canada*  
1327 *is the third-largest country in terms of land mass*”. If an annotator is in doubt as to whether something  
1328 is considered commonsense, they should not consider it commonsense.

### 1329 J.5.3 Justification Production

1330 In addition to the verdict, we as mentioned also ask annotators in Phase Three to write a short  
1331 statement justifying their verdict. This justification should explain the reasoning process used to  
1332 reach the verdict, along with any commonsense knowledge. If calculations or comparisons were used,  
1333 e.g. “*6.3% is greater than 6.1%*” or “*10-4=6*”, they should be explicitly stated in the justification.  
1334 Similarly, any rounding logic – e.g. “*4.3 million is approximately 4 million*” – should be explicitly  
1335 stated here.

1336 Other than commonsense knowledge, there should not be any new information presented in this  
1337 statement. The justification should only describe how the annotators used the information present in  
1338 the claim, the metadata, and the QA-pairs to reach their verdict. If a verdict cannot be reached, e.g. if  
1339 the *not enough information*-label is chosen, annotators should instead describe what information is  
1340 missing – e.g. “*I cannot determine if Canada is the third-largest country, because the questions do*  
1341 *not specify how large any countries are.*”

1342 Similarly, in cases of conflicting evidence, annotators should describe which questions and answers  
1343 lead to the conflict, and how they contradict – e.g. “*This claim is cherry-picked as it looks only at the*

**Biden lead disappears in NV, AZ, GA, PA.**

Claim Speaker

Claim Source

Facebook

Claim Date

2020-11-10

Location

US

Justification \*

Many media organizations believe Biden will win in NV, AZ, GA, and PA. As such, his lead has not disappeared.

Claim Label \*

Refuted

The claim lacks context or is otherwise impossible to understand.

Verdict Validation (1/15)

Please read the claim and the question-answer pairs. Then, give your verdict on the claim. Do not look at any external information; make your verdict based ONLY on the question-answer pairs. If there are any problems with a question-answer pair, please use the form to report it. Do not use the information in any question-answer pair you report to make your verdict.

Question

Which media outlets predict Biden will win in Georgia?

Potential problems with this question. Check any you think apply:

☐ The question is not understandable/readable

☐ The question is unrelated to the claim

Answer

No answer could be found.

Potential problems with this answer. Check any you think apply:

☐ The answer is not understandable/readable

☐ Answer seems wrong, but is supported by the source

☐ Answer seems wrong, and is not supported by the source

☐ I believe the source may be biased

Question

Which media outlets predict Biden will win in Arizona?

Potential problems with this question. Check any you think apply:

☐ The question is not understandable/readable

☐ The question is unrelated to the claim

Answer

Fox News

Potential problems with this answer. Check any you think apply:

☐ The answer is not understandable/readable

☐ Answer seems wrong, but is supported by the source

☐ Answer seems wrong, and is not supported by the source

☐ I believe the source may be biased

PREVIOUS

SUBMIT

NEXT

Figure 16: Interface of quality control. ① Text field for entering the justification. ② Label of the claim and the checkbox of unreadable. Notice that once the unreadable option is selected, annotators do not need to select the label for the claim. ③ The question corresponds to the current claim. Here we have two question-answer pairs. If the annotator think the there exist potential problems with this question, check any options applied. ④ The answers corresponds to the question on the left. If the annotator think the there exist potential problems with the answer, check any options applied. ⑤ Buttons for submitting the current claim, going to the previous claim, and next claim.

1344 *price of vanilla icecream, for which an increase did take place, but leaves out other flavours, where*  
 1345 *no increase happened."*

## 1346 J.6 Dispute Resolution

1347 For some claims, there may be a disagreement between the labels produced by annotators in the  
 1348 question generation and quality control phases. In those cases, the claim will go through a second  
 1349 round of question generation and quality control. While the instructions given in Sections J.4.3  
 1350 and J.5 still apply, we give a few extra recommendations specific to dispute resolution here.

### 1351 J.6.1 Vague Claims

1352 Some claims may pass to the dispute resolution phase because they are too vague for annotators in  
 1353 phases two and three to agree on the meaning. In order to catch these cases, the final step of dispute  
 1354 resolution – that is, the extra quality control step at the end – includes an additional label, *Claim Too*  
 1355 *Vague*. This should be select when and only when an annotator can understand the claim (e.g. it is  
 1356 readable), but there is too much doubt over how it is supposed to be interpreted. For example, the  
 1357 claim "*Ohio is the best state*" is too vague as it is not clear what "best" refers to.

### 1358 **J.6.2 Adding and Modifying Questions**

1359 The aim of dispute resolution is to resolve the conflict so that a potential new reader would come to a  
1360 conclusive verdict. As such, the annotator should not necessarily agree with either the Phase Two or  
1361 the Phase Three-verdict; they should attempt to make the fact-checking unambiguous. There may be  
1362 cases where new questions must be added, and cases where existing questions should be changed  
1363 but no new questions are necessary. There may also be cases where no change to the evidence is  
1364 necessary at all, but where either the Phase Two or Phase Three-annotator has simply entered a wrong  
1365 verdict. For this final category adding additional evidence to provide clarity can still be helpful, but it  
1366 is not necessary; annotators should use their own judgment here.

### 1367 **J.6.3 NEI-verdicts**

1368 A common case for dispute resolution is the situation where the Phase Two annotator has selected  
1369 *Supported*, *Refuted*, or *Conflicting Evidence/Cherrypicking* as the verdict, but the Phase Three  
1370 annotator has selected *Not Enough Evidence*. This can happen for example if Phase Two annotators  
1371 forget to gather some of the evidence they use to reach the verdict, rely on aspects only stated in  
1372 the fact-checking article without making it explicit through a question-answer pair, or overestimate  
1373 the strength of the evidence they have gathered. In these cases, the aim of dispute resolution is to  
1374 gather additional evidence and resolve the conflict that way; i.e. it is not sufficient to give a *Not*  
1375 *Enough Information*-verdict without attempting to add evidence (although the same time limit as in  
1376 P2 applies).
